# Supplementary material
Source: PubMed Central journal article supplement (PMC4508323)
Supplement: MCB.00448-15_zmb999100922so1.pdf [file MCB.00448-15_zmb999100922so1.pdf]

## SUPPLEMENTAL MATERIAL

**Figure S1. *Gi*Tom40 biotinylation by cytosolic BirA.** *Gi*Tom40 is biotinylated when co-expressed with cytBirA. BAP-tagged *Gi*Tom40 was detected by streptavidin conjugated with Alexa 488 (green). Cytosolic BirA was detected with anti-HA tag antibody (red). Nuclei were stained with DAPI (blue).

**Figure S2. Localization of N-terminally truncated *Gi*MOMP35 and full length GL50803\_9296.**

(A) When *Gi*MOMP35 was expressed without two predicted N-terminal transmembrane domains ( $\Delta$ *NGi*MOMP35) its mitochondrial localization was abolished and the protein was localized in the cytosol.  $\Delta$ *NGi*MOMP35 was detected by anti-HA tag antibody (green) and mitochondria were labeled by anti-GL50803\_9296 antibody (red), nuclei were stained with DAPI (blue). (B) During the protease protection assay the HSP from wild type *G. intestinalis* was solubilized in isotonic, hypotonic, NaCl-containing or Triton-containing buffer. The suspensions were treated either by pipetting or sonication and subjected to the treatment by proteinase K. The resulting samples were resolved on SDS-PAGE, transferred to membrane and probed for the matrix marker protein IscS, outer membrane protein Tom40 and GL50803\_9296. While Tom40 was sensitive to the protease in the isotonic buffer, both GL50803\_9296 and IscS remained protected by mitochondrial membranes. These data suggest the matrix localization of GL50803\_9296.

**Figure S3. The compiled lists of the most significant hits obtained from the purification**

**experiments of five mitochondrial proteins.** The results were divided into two sets derived either from the purification of the matrix or the outer membrane proteins. The results were colour-coded in (A): the proteins found in *Gi*Pam18- and *Gi*Tim44-specific datasets are shown in green, the proteins found in *Gi*Pam18- and *Gi*Hsp70-specific datasets are shown in red, the proteins found in *Gi*Tim44- and *Gi*Hsp70-specific datasets are shown in blue and the proteins common to all three datasets are shown in yellow. In (B), the proteins found in *Gi*Tom40- and *Gi*MOMP35-specific datasets are shown in violet. The novel mitochondrial proteins confirmed by episomal expression are shown with red

borders and the proteins whose episomal expression resulted in a different than mitochondrial localization are shown in grey. The proteins, the episomal expression of which induced a lethal phenotype, are labelled by a black cross.

**Table S1. Primers used in the study.**

**Table S2. The list of genes episomally expressed in *G. intestinalis*.**

**Table S3. Distribution of the identified proteins in metamonads.**

The genome project of *T. vaginalis* and *S. salmonicida* were searched for the presence of the novel *G. intestinalis* mitochondrial proteins.

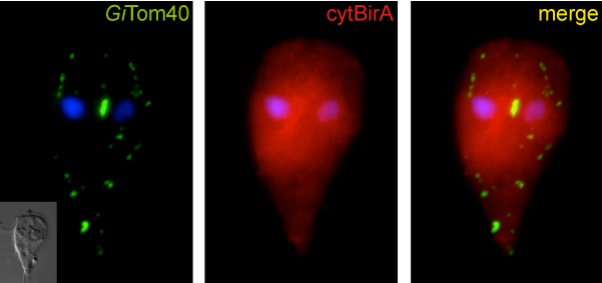

Supplementary Figure 1

A

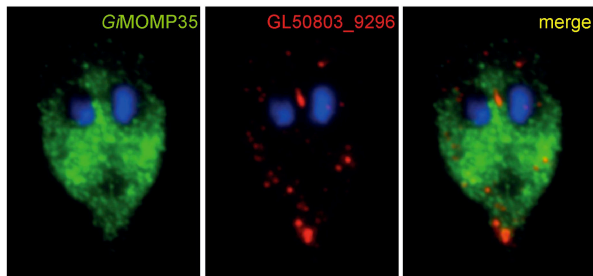

B

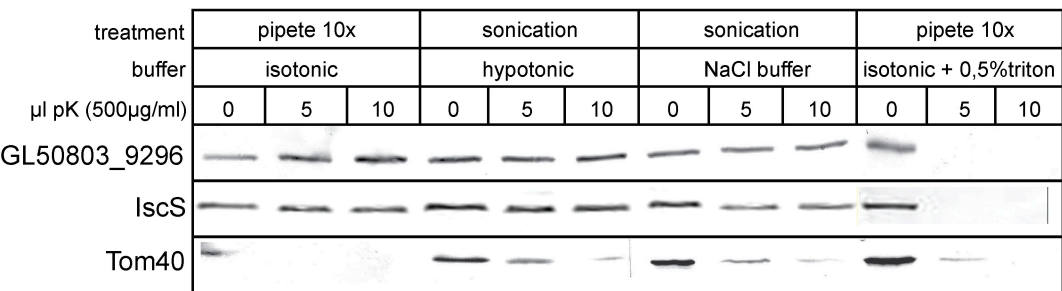

A

## Mitosomal matrix

| <i>GiPam18</i> | <i>GiTim44</i> | <i>GiMthHsp70</i> |
|----------------|----------------|-------------------|
| Pam18          | Tim44          | Hsp70             |
| Hsp70          | glutaredoxin   | GL50803_16424     |
| glutaredoxin   | Hsp70          | GL50803_12229     |
| Mge1           | GPP            | GL50803_16891     |
| IscA           | Mge1           | GL50803_8148      |
| Cpn60          | GL50803_16424  | GiOR-1            |
| GPP            | IscA           | Tim44             |
| Tim44          | Ferredoxin     | GL50803_7035      |
| Nfu            | GL50803_137745 | GL50803_12598     |
| IscU           | GL50803_137712 | GL50803_14818     |
| GL50803_112784 | GL50803_16386  | IscA              |
| GL50803_31998  | GL50803_92741† | GL50803_16350     |
| GL50803_16424  | GL50803_3491   | GL50803_16985     |
| GL50803_17276  | GL50803_15023  | GL50803_17312     |
| GL50803_9296   | GL50803_113722 | Ferredoxin        |
| GL50803_16978  | GL50803_17276  | GL50803_3141      |
| GL50803_7608   | IscS           | GL50803_3957      |
| GL50803_16049  | Cpn60          | GL50803_8726      |
| GL50803_15991  | GL50803_13555  | GL50803_8955      |
| GL50803_6544   | Pam18          | GL50803_9148      |
| GL50803_15487  | GL50803_14216  | GL50803_14198     |
| GL50803_6317   | GL50803_17492  | GL50803_16926     |
| GiOR-1         | GL50803_24842  | GL50803_2822      |
| GL50803_27910  | GiOR-1         | GL50803_4415      |
| GL50803_137726 | GL50803_2305   | GL50803_8974      |
| GL50803_15476  | GL50803_8358   | GL50803_8243      |
| GL50803_9363   | GL50803_40390  | IscU              |
| GL50803_92741† | GL50803_2527   | GL50803_17258     |
| GL50803_8358   | GL50803_16944  | GL50803_2338      |
| GL50803_23630  | GL50803_5305   | GL50803_4692      |

B

## Outer mitosomal membrane

| <i>GiTom40</i> | <i>GiMOMP35</i> |
|----------------|-----------------|
| Tom40          | MOMP35          |
| GL50803_13922  | GL50803_14818†  |
| GL50803_10971  | GL50803_16926   |
| GL50803_114210 | GL50803_16985   |
| GL50803_7188   | GL50803_14198   |
| MOMP35         | GL50803_10971   |
| GL50803_8152   | GL50803_29796   |
| GL50803_14297  | GL50803_16981   |
| GL50803_16424  | GL50803_8623    |
| GL50803_22291  | GL50803_8460    |
| GL50803_91712  | GL50803_16424   |
| GL50803_137685 | Tom40           |
| GL50803_17276  | GL50803_2822    |
| GL50803_96818  | GL50803_3957    |
| GL50803_14469  | GL50803_4590    |
| GL50803_33674  | GL50803_12224   |
| GL50803_6939   | GL50803_8955    |
| GL50803_22587  | GL50803_7188    |
| GL50803_31295  | GL50803_7778    |
| GL50803_7242   | Hsp70           |
| GL50803_21505  | GL50803_10452   |
| GL50803_40224  | GL50803_4852    |
| GL50803_9529   | GL50803_12229   |
| GL50803_15104  | GL50803_17312   |
| GL50803_16679  | GL50803_22291   |
| GL50803_16957  | GL50803_6007    |
| GL50803_8471   | GL50803_17484   |
| GL50803_86468  | GL50803_22587   |
| GL50803_4852   | GL50803_7348    |
| GL50803_12945  | GL50803_13922   |

**Table S1. Primers used in the study**

|                               |                                                                                           |
|-------------------------------|-------------------------------------------------------------------------------------------|
| BirA MluI F                   | GATCACGCGTATGAAGGATAACACCG                                                                |
| BirA NsiI R                   | CATGATGCATTTTTCTGCACTACGC                                                                 |
| GiMgel-BirA NdeI F            | ATGCCATATGGCGCTTTCTGCAC                                                                   |
| GiMgel-BirA MluI R            | CATGACGCGTGATCTCGTGAGATGT                                                                 |
| GiPam18-BAP NdeI F            | CTAGCATATGCTACGTGTACTGAGCG                                                                |
| GiPam18-BAP BglII,<br>BamHI R | CATGAGATCTTACTCGTGCCATTCTATCTTCTGA<br>GCCTCAAAGATGTCATTTAGGCCGGATCCGCATC<br>TGTTCTGAGCTTC |
| GiTim44-BAP AseI F            | ACTGATTAATATGAAAAGTTTTACGCCCTAT                                                           |
| GiTim44-BAP BamHI R           | CATGGGATCCATAGAAATACGTCCGGCTTTGC                                                          |
| GiMtHsp70-BAP NdeI F          | CATGCATATGCTTAAGCGGCACGTAAG                                                               |
| GiMtHsp70-BAP BamHI R         | CATGGGATCCCGTGCTAGTGGCGCGTC                                                               |
| GiTom40-BAP AseI F            | CATGATTAATATGCCCTTTCCTGGTCT                                                               |
| GiTom40-BAP BglII R           | CATGAGATCTTTGTGATTGCTCGAAG                                                                |
| GiMOMP35-BAP NdeI F           | CATGCATATGCCGGCTCACAGACACAG                                                               |
| GiMOMP35-BAP BglII R          | CATGAGATCTATTTAGCCTTGCTTGG                                                                |
| GL50803_14845 AseI F          | CATGATTAATATGAAAAGTTTTACGCCCTA                                                            |
| GL50803_14845 PstI            | CATGCTGCAGATAGAAATACGTCCGC                                                                |
| DHFR MluI F                   | CATGACGCGTATGGTTCGACCATTGAAC                                                              |
| DHFR PstI R                   | CATGCTGCAGGTCTTTCTTCTCGTAGAC                                                              |
| GiMgel-DHFR NdeI F            | ATGCCATATGGCGCTTTCTGCAC                                                                   |
| GiMgel-DHFR MluI R            | CATGACGCGTG TAGATATCATTATCAC                                                              |
| GL50803_14818 NdeI F          | CATGCATATGCCACCTCTGGTTCCC                                                                 |
| GL50803_14818 NsiI R          | CATGATGCATACTCAGGAGCCATTTCATC                                                             |
| GL50803_12229 NdeI F          | CATGCATATGCGGTGCCAGGATGT                                                                  |
| GL50803_12229 NsiI R          | CATGATGCATGTTATAGAAGTATGTATT                                                              |
| GL50803_16891 AseI F          | CATGATTAATATGAGTACTTTGACTCGT                                                              |
| GL50803_16891 NsiI R          | CATGATGCATCCGTTTACTCAGCATGGC                                                              |
| GL50803_7035 NdeI F           | CATGCATATGATGTACAATTTGATGCTT                                                              |
| GL50803_7035 PstI R           | CATGCTGCAGATCTGACGAGGATGAGGT                                                              |
| GL50803_8358 NdeI F           | CATGCATATGAAGTACATTTTTGAT                                                                 |
| GL50803_8358 PstI R           | CATGCTGCAGGTTGAACTTCTTGGGCTC                                                              |
| GL50803_16386 NdeI F          | CATGCATATGATGCGTCCAACCAGGACC                                                              |
| GL50803_16386 NsiI R          | CATGATGCATGTGTGAAGATGACTCGAC                                                              |
| GL50803_10971 AseI F          | CATGATTAATATGAATGTTGCTGTCTTT                                                              |
| GL50803_10971 SbfI R          | CATGCCTGCAGGGTATTCAGCGAAAAGCCA                                                            |
| GL50803_22291 NdeI F          | CATGCATATGGCCGGAAGAAGGAG                                                                  |
| GL50803_22291 PstI R          | CATGCTGCAGCACACTGTCTGTGCTCCC                                                              |
| GL50803_4852 AseI F           | CATGATTAATATGGAGGACCTTCCCTTC                                                              |
| GL50803_4852 NsiI R           | CATGATGCATTA CTATCGAGAAACGACG                                                             |
| GL50803_16424 AseI F          | CTAGATTAATCCCAGTAGTAAATAC                                                                 |
| GL50803_16424 NsiI R          | CTAGATGCATGTAGCGACGATTACCGGATGA                                                           |

|                      |                                   |
|----------------------|-----------------------------------|
| GL50803_8148 NdeI F  | CATGCATATGATGAGGCCTCGTCCT         |
| GL50803_8148 PstI R  | CATGCTGCAGGTACGTTCTATAGAC         |
| GL50803_12598 NdeI F | CATGCATATGATGGAAGACGAGATG         |
| GL50803_12598 NsiI   | CATGATGCATAAGGCCATCACTAGG         |
| GL50803_17276 NdeI   | CATGCATATGATGCCTCGGCGCTTC         |
| GL50803_17276 SbfI R | CATGCCTGCAGGAGACGGTCTTGAAGCATT    |
| GL50803_27910 NdeI F | CGATCATATGCTTGCGAGCTTGCCACAGAC    |
| GL50803_27910 PstI R | CGATCTGCAGCCGAGGAGAATCTGGTGGCA    |
| GL50803_3491 NdeI F  | CGATCATATGCTATCTTTGACTACCATCAAG   |
| GL50803_3491 PstI R  | CGATCTGCAGCTCGTTCGCACTGGCGTGTG    |
| GL50803_92741 NdeI F | CGATCATATGGCACTGTCTTCACGCCAAA     |
| GL50803_92741 PstI R | CGATCTGCAGATTTATCCCGAAAGCAATAT    |
| GL50803_13922 XhoI F | CTAGCTCGAGATGTTACTTCTCCTCTGCTGG   |
| GL50803_13922 SbfI R | CATGCCTGCAGGTTACGCTGCCATGAGAGATAT |
| GL50803_7188 NsiI F  | CTAGATGCATATGTGGGTGCGTGCA         |
| GL50803_7188 ApaI R  | CTAGGGGCCCTTAAAGAGCTGATAT         |
| GL50803_22587 XhoI F | CTAGCTCGAGATGCCATTAAATCGC         |
| GL50803_22587 PstI R | CTAGCTGCAGTCACTTGTTGGCTCG         |

**Table S2. List of proteins expressed in *G. intestinalis*.**

|     |               |
|-----|---------------|
| 1.  | GL50803_3491  |
| 2.  | GL50803_4852  |
| 3.  | GL50803_7035  |
| 4.  | GL50803_7188  |
| 5.  | GL50803_8148  |
| 6.  | GL50803_10971 |
| 7.  | GL50803_12229 |
| 8.  | GL50803_12598 |
| 9.  | GL50803_14818 |
| 10. | GL50803_16386 |
| 11. | GL50803_16424 |
| 12. | GL50803_16891 |
| 13. | GL50803_17276 |
| 14. | GL50803_22291 |
| 15. | GL50803_22587 |
| 16. | GL50803_27910 |
| 17. | GL50803_92741 |



**Table S3. Distribution of the identified proteins in metamonads.**

| <i>G. intestinalis</i> | <i>S. salmonicida</i> | <i>E. cyprinoides</i> | <i>C. embranifera</i> | <i>T. vaginalis</i>        |
|------------------------|-----------------------|-----------------------|-----------------------|----------------------------|
| <i>GiTim44</i>         | -                     | yes                   | yes                   | TVAG_008790                |
| <i>GiMOMP35</i>        | -                     | -                     | -                     | -                          |
| GL50803_12229          | -                     | -                     | -                     | -                          |
| GL50803_7035           | -                     | -                     | -                     | -                          |
| GL50803_8358           | -                     | -                     | -                     | -                          |
| GL50803_16386          | -                     | -                     | -                     | -                          |
| GL50803_10971          | -                     | -                     | -                     | -                          |
| GL50803_4852           | -                     | -                     | -                     | -                          |
| GL50803_7188           | -                     | -                     | -                     | -                          |
| GL50803_13922          | -                     | -                     | -                     | -                          |
| GL50803_22587          | -                     | -                     | -                     | -                          |
| GL50803_16424          | SS50377_12584         | -                     | -                     | -                          |
| GL50803_8148           | -                     | -                     | -                     | -                          |
| GL50803_17276          | -                     | -                     | -                     | -                          |
| GL50803_3491           | SS50377_15743         | -                     | -                     | -                          |
| GL50803_27910          | SS50377_11382         | -                     | -                     | TVAG_337220<br>TVAG_462300 |
